# Supplementary material for: The m6A “reader” YTHDF1 promotes osteogenesis of bone marrow mesenchymal stem cells through translational control of ZNF839
Source: PubMed Central journal article supplement (PMC8590051; doi:10.1038/s41419-021-04312-4), 2021-11-12
Supplement: 41419_2021_4312_MOESM1_ESM.pdf [file 41419_2021_4312_MOESM1_ESM.pdf]

**Fig. S1 Loss- and gain-of-Ythdf1 function on osteogenesis in mouse BMSCs.**

(A and B) Ythdf1 mRNA and protein levels detected 72 h after transfection of pLVX-Ythdf1. \*\*\* $P < 0.01$  compared with pLVX-Vector. (C) ALP and Alizarin Red staining to detect osteogenesis of BMSCs after pLVX-Ythdf1 transfection for 7 or 14 days. (D) mRNA expression levels of Alp, Ocn, Osterix and Runx2 detected 72 h after osteogenic induction. \* $P < 0.05$ , \*\*\* $P < 0.01$  compared with the NC and pLVX-Vector groups. (E) ALP and Alizarin Red staining of WT and Ythdf1 KO cells. (F) mRNA expression of osteoblast-specific genes detected in WT and Ythdf1 KO cells 72 h after osteogenic induction (Paired t test,  $n=3$ , \* $P < 0.05$  and \*\*\* $P < 0.01$ ). All experiments were independently performed in triplicate.

**Fig. S2 Zfp839 knockdown efficiency verification.**

Three shRNAs were generated to suppress Zfp839 expression. (A and B) Zfp839 mRNA and protein expression levels detected 72 h after shRNA transfection. (Paired t test,  $n=3$ , \* $P < 0.05$ , \*\*\* $P < 0.01$  compared with the NC and NC-shRNA groups). All experiments were independently performed in triplicate.

**Fig. S3 Co-localization of Ythdf1 and Zfp839 in bone marrow.**

(A) Immunofluorescence staining showing that Ythdf1 and Zfp839 co-localized in bone marrow in WT group, which cannot be shown in Ythdf1 KO group. Scale bar = 20  $\mu\text{m}$ .

**Fig. S4 Zfp839 overexpression potentiates mouse BMSCs osteogenesis.**

**(A and B)** Zfp839 mRNA expression and protein levels detected 72 h after transfection of pLVX-Zfp839. (Paired t test, n=3, \*\*\* $P < 0.01$  compared with pLVX-Vector). **(C)** mRNA expression of osteogenic-specific genes detected 72 h after osteogenic induction of Zfp839 overexpression, (Paired t test, n=3, \* $P < 0.05$ , # $P < 0.01$  versus NC or pLVX-Vector samples). **(D)** ALP and Alizarin Red staining performed to detect the osteogenesis of mouse BMSCs after Zfp839 overexpression. All experiments were independently performed in triplicate.
